# Supplementary material
Source: PubMed Central journal article supplement (PMC3507423)
Supplement: NIHMS402689-supplement-Supp_Fig_S1-S2.pdf [file NIHMS402689-supplement-Supp_Fig_S1-S2.pdf]

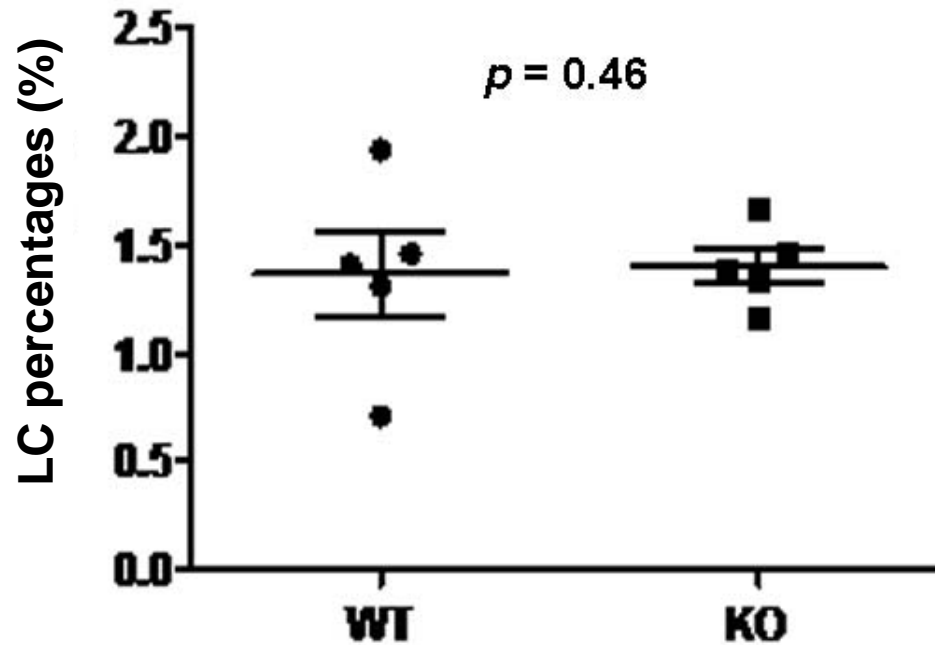

**Figure S1. The percentage of epidermal LCs after the culture in vitro.** Epidermal cell suspensions from miR-150KO and WT mice were cultured in complete culture medium for 48h, then stained with anti-CD45.2, MHCII, and langerin antibodies. The percentages of LCs were analyzed by flow cytometry.

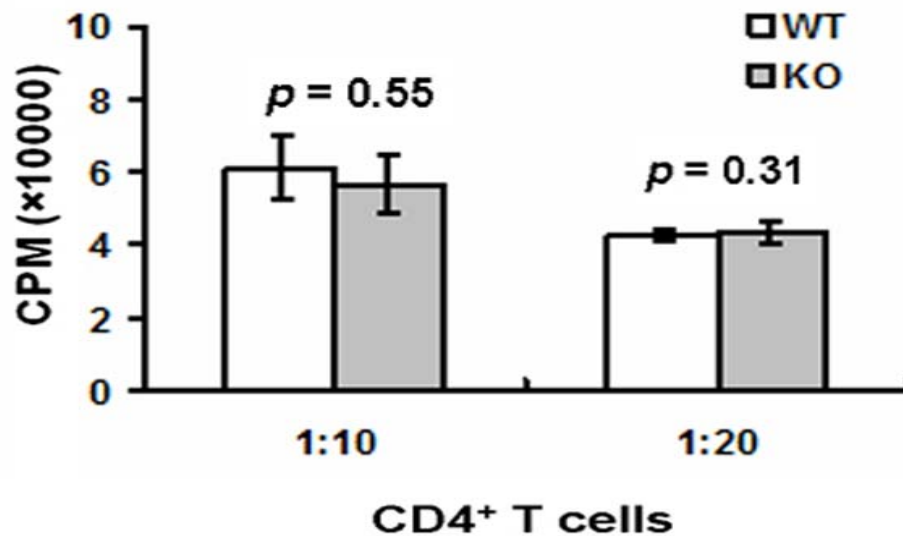

**Figure S2. miRNA miR-150 is not required for LCs-mediated CD4 T cell proliferation.**

Epidermal cell suspensions from miR-150KO and WT mice pulsed with 0.5 mg/ml ovalbumin protein overnight. After extensive 4-5 times washing, cells were further cultured for 36h. LCs from cultured epidermal cells were first enriched by AutoMACS (the purity of LCs was up to 30%) and then sorted by a FACSAriaII Cell Sorter (the purity of LCs was up to 99%). Sorted LCs were co-cultured with  $2.5 \times 10^4$  antigen-specific CD4<sup>+</sup> T cells from OT-II mice for 3 days. Incorporation of radioactivity during the last 16h of culture was measured. Data are representative of 2 independent experiments, 3-4 mice/experiment.
